# Supplementary material for: PD-L1 Testing and Squamous Cell Carcinoma of the Head and Neck: A Multicenter Study on the Diagnostic Reproducibility of Different Protocols
Source: PubMed Central journal article supplement (PMC7830149; doi:10.3390/cancers13020292), 2021-01-14
Supplement: cancers-13-00292-s001.pdf [file cancers-13-00292-s001.pdf]

# Supplementary Materials: PD-L1 Testing and Squamous Cell Carcinoma of the Head and Neck: A Multicenter Study on the Diagnostic Reproducibility of Different Protocols

Simona Crosta, Renzo Boldorini, Francesca Bono, Virginia Brambilla, Emanuele Dainese, Nicola Fusco, Andrea Gianatti, Vincenzo L'Imperio, Patrizia Morbini and Fabio Pagni

**Table S1.** CPS extended results. ne, not evaluable.

| N  | Protocol 1 | Protocol 2* | Protocol 3 | Protocol 4 | Protocol 5 | GS   |
|----|------------|-------------|------------|------------|------------|------|
| 1  | 90         | >20         | 80         | 100        | 100        | 100  |
| 2  | ne         | ne          | ne         | ne         | ne         | ne   |
| 3  | 0          | 1–20        | 0          | 1          | 0          | 3    |
| 4  | 0          | <1          | 0          | 0          | ne         | 0    |
| 5  | 15         | >20         | 35         | 82         | 40         | 19   |
| 6  | ne         | ne          | ne         | ne         | ne         | 0    |
| 7  | ne         | <1          | ne         | ne         | 0          | 0    |
| 8  | 60         | >20         | 10         | 26         | 50         | 40   |
| 9  | 50         | >20         | 30         | 14         | 60         | 25   |
| 10 | 80         | 1–20        | 15         | 4          | 5          | 25   |
| 11 | ne         | ne          | ne         | ne         | ne         | 0    |
| 12 | 80         | >20         | 70         | 100        | 100        | 90   |
| 13 | 5          | 1–20        | 1,5        | 2,5        | 0          | 1–20 |
| 14 | 10         | 1–20        | 8,5        | 10         | 5          | >20  |
| 15 | 15         | >20         | 12,5       | 12,5       | 15         | >20  |
| 16 | 10         | >20         | 11,5       | 12,5       | 25         | 15   |
| 17 | 0          | <1          | 0          | 0          | 0          | 0    |
| 18 | 0          | <1          | 0          | 1          | 0          | 0    |
| 19 | ne         | ne          | ne         | ne         | ne         | ne   |
| 20 | 0          | <1          | 5          | 8          | 0          | 10   |
| 21 | ne         | <1          | ne         | ne         | ne         | 0    |
| 22 | 70         | >20         | 80         | 100        | 100        | 100  |
| 23 | 2          | 1–20        | 0          | 0          | 0          | 8    |
| 24 | 10         | <1          | 70         | 100        | 95         | 0    |
| 25 | 85         | >20         | 80         | 100        | 100        | >20  |
| 26 | ne         | ne          | ne         | ne         | ne         | >20  |
| 27 | ne         | ne          | ne         | ne         | ne         | ne   |
| 28 | 60         | >20         | 45         | 60         | 75         | >20  |
| 29 | 5          | 1–20        | 4          | 20         | 3          | 15   |
| 30 | 10         | 1–20        | 3          | 5          | 1          | 5    |
| 31 | ne         | ne          | ne         | ne         | 0          | 1–20 |
| 32 | 18         | >20         | 30         | 30         | 100        | >20  |
| 33 | 5          | >20         | 4          | 60         | 20         | >20  |
| 34 | 0          | 1–20        | 0          | 6          | 7          | >20  |
| 35 | 2          | <1          | 2          | 12         | 3          | 15   |
| 36 | 5          | 1–20        | 9          | 13         | 20         | >20  |
| 37 | 0          | ne          | 0          | 0          | 0          | 0    |
| 38 | 0          | ne          | 0          | 15         | 0          | 0    |
| 39 | 0          | <1          | 3          | 30         | 1          | ne   |
| 40 | 15         | 1–20        | 0          | 2          | 0          | 10   |

\* Results were expressed in reference ranges due to the peculiar characteristics of SP142 staining.

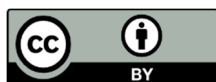

© 2021 by the authors. Licensee MDPI, Basel, Switzerland. This article is an open access article distributed under the terms and conditions of the Creative Commons Attribution (CC BY) license (<http://creativecommons.org/licenses/by/4.0/>).
